# Supplementary material for: High-throughput metabolomics to identify metabolites to serve as diagnostic biomarkers of prostate cancer
Source: Royal Society of Chemistry journal article supplement (doi:10.1039/c6ay00127k), 2016-01-01
Supplement: c6ay00127k1.pdf [file c6ay00127k1.pdf]

**Table 1.** Clinical Characteristics of Patients

| <b>Parameter</b>       | <b>Healthy Controls (n = 500)</b> | <b>PCa Patients (n = 560)</b> | <b>P value</b> |
|------------------------|-----------------------------------|-------------------------------|----------------|
| Age, years             | 69.3 ± 5.2                        | 68.2 ± 5.8                    | 0.32           |
| BMI, kg/m <sup>2</sup> | 23.11 ± 1.27                      | 23.32 ± 1.52                  | 0.69           |
| DBP, mmHg              | 75.13 ± 8.16                      | 76.44 ± 8.21                  | 0.49           |
| SBP, mmHg              | 147.10 ± 22.31                    | 145.09 ± 23.38                | 0.66           |
| Serum FBG, mmol/L      | 5.7 ± 1.3                         | 5.9 ± 1.5                     | 0.19           |
| Serum TG, mmol/L       | 1.5 ± 0.2                         | 1.6 ± 0.3                     | 0.54           |
| Serum TC, mmol/L       | 4.7 ± 0.6                         | 4.8 ± 0.7                     | 0.53           |
| PSA (ng/ml mean ± SD)  | 1.2 ± 0.34                        | 9.8 ± 5.6                     | 0.0019         |

Note: BMI, body mass index; DBP, diastolic blood pressure; FBG, fasting (2 hours postprandial) blood glucose; SBP, systolic blood pressure; TC, total cholesterol; TG, triglycerides; PSA, serum prostate-specific antigen. Parameter values of patients and healthy control were compared using t-test. The p values less than 0.05 were considered significant.
